# Supplementary material for: Quality of life among caregivers of people with end-stage kidney disease managed with dialysis or comprehensive conservative care
Source: PubMed Central journal article supplement (PMC7199363; doi:10.1186/s12882-020-01830-9), 2020-05-04
Supplement: 12882_2020_1830_MOESM1_ESM.pdf [file 12882_2020_1830_MOESM1_ESM.pdf]

Additional file table 1: SF-6D utility and CES score according to caregiver characteristics and care recipient treatment group

| Characteristics                                             | SF-6D (n = 58) <sup>†</sup> |         | CES (n = 61) <sup>††</sup> |         |
|-------------------------------------------------------------|-----------------------------|---------|----------------------------|---------|
|                                                             | Mean ± SD                   | P-value | Mean ± SD                  | P-value |
| <b>Age</b>                                                  |                             | 0.16    |                            | 0.90    |
| ≤76 years                                                   | 0.76 ± 0.14                 |         | 74.68 ± 18.78              |         |
| >76 years                                                   | 0.71 ± 0.12                 |         | 74.09 ± 16.61              |         |
| <b>Gender</b>                                               |                             | 0.38    |                            | 0.27    |
| Males                                                       | 0.76 ± 0.15                 |         | 78.61 ± 18.16              |         |
| Females                                                     | 0.73 ± 0.12                 |         | 72.92 ± 17.46              |         |
| <b>Care recipient treatment<sup>‡</sup></b>                 |                             | 0.05*   |                            | 0.0002* |
| Dialysis                                                    | 0.70 ± 0.13                 |         | 64.39 ± 16.75              |         |
| Conservative care                                           | 0.77 ± 0.12                 |         | 80.91 ± 15.20              |         |
| <b>Country</b>                                              |                             | 0.96    |                            | 0.0003* |
| United Kingdom                                              | 0.74 ± 0.13                 |         | 59.96 ± 15.60              |         |
| Australia                                                   | 0.74 ± 0.13                 |         | 78.72 ± 16.00              |         |
| <b>Education<sup>‡‡</sup></b>                               |                             | 0.53    |                            | 0.51    |
| Attended some high school or lower levels                   | 0.74 ± 0.12                 |         | 75.89 ± 18.47              |         |
| Completed high school or tertiary education                 | 0.73 ± 0.14                 |         | 72.89 ± 16.98              |         |
| <b>Private health insurance<sup>§</sup></b>                 |                             | 0.53    |                            | 0.80    |
| Yes                                                         | 0.72 ± 0.15                 |         | 74.82 ± 14.89              |         |
| No/Unknown                                                  | 0.74 ± 0.12                 |         | 73.60 ± 18.75              |         |
| <b>Care recipient length of kidney disease<sup>§§</sup></b> |                             | 0.65    |                            | 0.73    |
| 0-2 years                                                   | 0.71 ± 0.15                 |         | 77.05 ± 7.55               |         |
| >2 years                                                    | 0.74 ± 0.13                 |         | 74.08 ± 18.59              |         |
| <b>Length of care</b>                                       |                             | 0.21    |                            | 0.42    |
| 0-2 years                                                   | 0.69 ± 0.12                 |         | 76.80 ± 7.85               |         |
| > 2 years                                                   | 0.74 ± 0.14                 |         | 73.73 ± 19.38              |         |

<sup>†</sup> SF-6D - Short Form six dimensions. Different SF-6D algorithms were used to convert the SF-12 scores to preference based SF-6D utilities for the UK and Australian population. 5 observations were missing from SF-6D calculations out of N = 63. <sup>††</sup> CES - Carer Experience Scale. 2 observations were missing from CES calculations out of N = 63. <sup>‡</sup> The dialysis group consists of Facility Hemodialysis, Home Hemodialysis and Peritoneal dialysis. <sup>‡‡</sup> Individual responses to Primary school/Some high school were merged to one category as "Attended some high school or lower levels" and the responses to GCSEs/Completed high school/Diploma/TAFE/ Completed A- levels/ University degree were merged to one category as "Completed high school or tertiary education". <sup>§</sup> Individual responses to "No" and "Unknown" were merged to one category as "No/Unknown". <sup>§§</sup> Individual responses to less than a year and 1 - 2 years of the length of kidney disease were merged to one category as 0-2 years. <sup>¶</sup> The responses varied from less than a year to more than 20 years and were grouped in two categories 0-2 years and > 2 years. \* p < 0.05, statistical significance, the significance is between the sub-groups. CI - Confidence interval.

Additional file table 2: Mean scores and weights of SF-6D and Carer Experience Scale (CES) according to care recipient treatment group

| Instrument                                       | Dialysis (n=24)*   |                      | Conservative Care (n=37) |                      |
|--------------------------------------------------|--------------------|----------------------|--------------------------|----------------------|
|                                                  | Score<br>Mean (SD) | Weights<br>Mean (SD) | Score<br>Mean (SD)       | Weights<br>Mean (SD) |
| <b>SF-6D</b> ‡                                   |                    |                      |                          |                      |
| Physical functioning                             | 2.27 (2.11)        | -0.008 (0.02)        | 1.73 (0.69)              | -0.006 (0.02)        |
| Role limitations                                 | 2.85 (1.80)        | -0.04 (0.03)         | 1.72 (1.16)              | -0.02 (0.03)         |
| Social functioning                               | 3.04 (2.18)        | -0.05 (0.03)         | 2.46 (1.52)              | -0.05 (0.03)         |
| Pain                                             | 2.46 (1.75)        | -0.02 (0.03)         | 2.05 (0.97)              | -0.02 (0.03)         |
| Mental health                                    | 3.19 (1.88)        | -0.06 (0.03)         | 2.32 (1.45)              | -0.04 (0.03)         |
| Vitality                                         | 3.42 (1.98)        | -0.08 (0.01)         | 2.76 (1.36)              | -0.08 (0.01)         |
| <b>CES</b> ‡‡                                    |                    |                      |                          |                      |
| Activities outside caring                        | 1.88 (0.85)        | 9.96 (9.02)          | 2.46 (0.65)              | 16.23 (5.52)         |
| Support from family and friends                  | 2.08 (0.58)        | 11.85 (5.13)         | 2.70 (0.52)              | 16.10 (3.72)         |
| Assistance from organisations and the government | 1.46 (0.66)        | 4.43 (5.95)          | 1.92 (0.76)              | 8.50 (6.43)          |
| Fulfilment from caring                           | 2.54 (0.59)        | 12.16 (3.74)         | 2.59 (0.55)              | 12.51 (3.34)         |
| Control over caring                              | 2.29 (0.81)        | 10.95 (3.63)         | 2.65 (0.54)              | 12.61 (1.95)         |
| Getting on with the person you care for          | 2.79 (0.41)        | 15.04 (4.12)         | 2.78 (0.42)              | 14.96 (4.15)         |

\*2 observations missing from SF-6D scores and weights calculation. ‡ SF-6D domain scores are weighted decrements. ‡‡ CES domain scores are weighted increments. SD - Standard deviation.

**Additional file table 3: Differences in SF-6D utility and CES score based on the type of relationship with the care recipient**

|                                 | <b>SF-6D (n = 58)†</b>      | <b>CES (n = 61)††</b>       |
|---------------------------------|-----------------------------|-----------------------------|
| <b>Relationship comparison</b>  | <b>Difference (95 % CI)</b> | <b>Difference (95 % CI)</b> |
| <b>Spouse/Partner - Child</b>   | -0.13 (-0.25; 0.006)        | -17.22 (-34.18; -0.25)*     |
| <b>Spouse/Partner - Sibling</b> | 0.16 (-0.19; 0.51)          | 4.10 (-42.16; 50.36)        |
| <b>Spouse/Partner - Other</b>   | 0.005 (-0.14; 0.14)         | 2.62 (-14.34; 19.59)        |
| <b>Child - Sibling</b>          | 0.28 (-0.08; 0.64)          | 21.32 (-26.80; 69.43)       |
| <b>Child - Other</b>            | 0.13 (-0.04; 0.31)          | 19.84 (-1.68; 41.36)        |
| <b>Sibling - Other</b>          | -0.15 (-0.52; 0.21)         | -1.48 (49.59; 46.64)        |

† SF-6D - Short Form six dimensions. Different SF-6D algorithms were used to convert the SF-12 scores to preference based SF-6D utilities for the UK and Australian population. 5 observations were missing from SF-6D calculations out of N = 63. †† CES - Caring Experience Scale. 2 observations were missing from CES calculations out of N = 63. \* p < 0.05, statistical significance, the significance is between the sub-groups. CI - Confidence interval.
