# Supplementary material for: Quality of life among caregivers of people with end-stage kidney disease managed with dialysis or comprehensive conservative care
Source: PubMed Central journal article supplement (PMC7199363; doi:10.1186/s12882-020-01830-9), 2020-05-04
Supplement: 12882_2020_1830_MOESM2_ESM.pdf [file 12882_2020_1830_MOESM2_ESM.pdf]

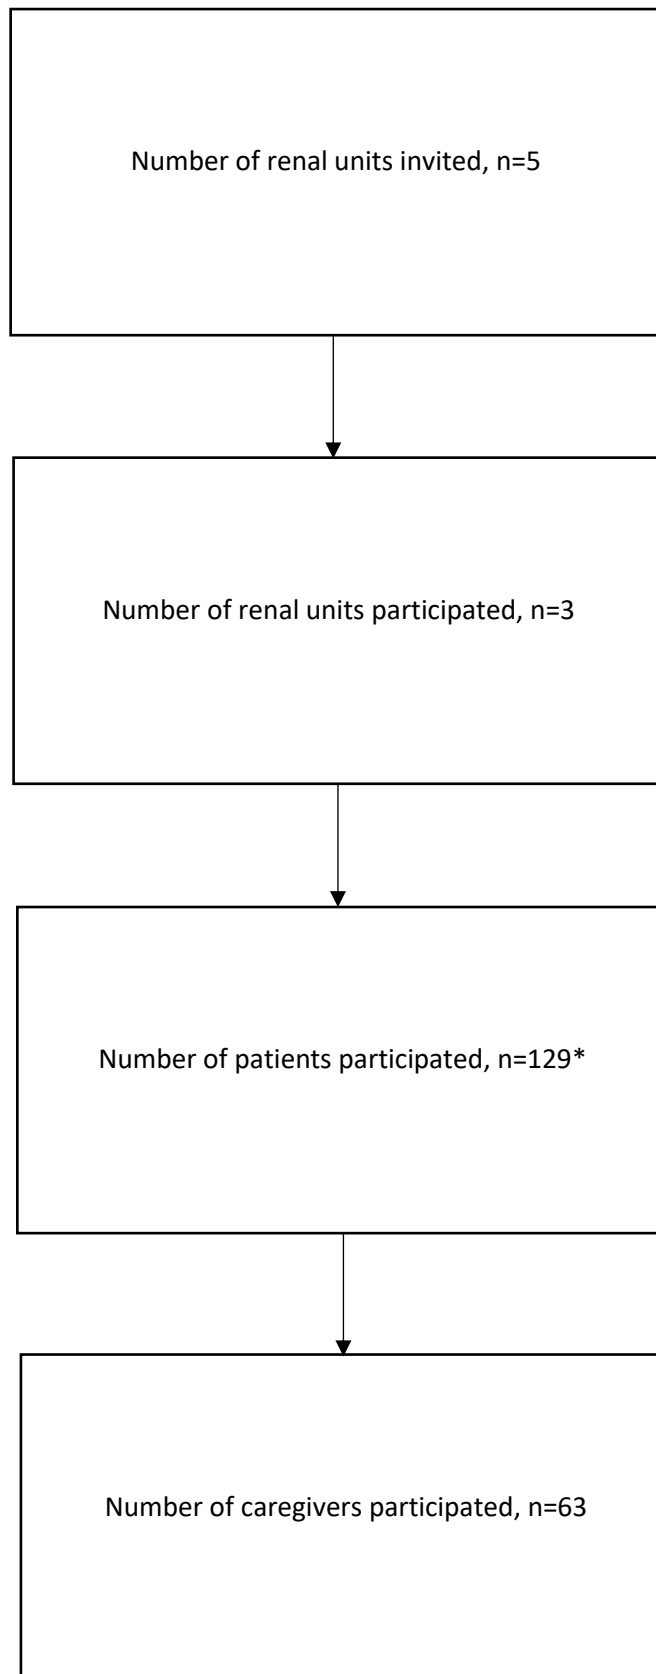

**Additional file figure 1: Caregivers/patient flow chart**

\*Many patients did not have a caregiver (lived alone, spouse deceased) or caregivers did not consider participating in the study and declined.
