# Supplementary material for: Quality of life among caregivers of people with end-stage kidney disease managed with dialysis or comprehensive conservative care
Source: PubMed Central journal article supplement (PMC7199363; doi:10.1186/s12882-020-01830-9), 2020-05-04
Supplement: 12882_2020_1830_MOESM3_ESM.pdf [file 12882_2020_1830_MOESM3_ESM.pdf]

**Additional file Item S1: STROBE Statement:** checklist of items that should be included in reports of observational studies

|                           | <b>Item No</b> | <b>Recommendation</b>                                                                                                           | <b>Yes/No/NA, Page No.</b> |
|---------------------------|----------------|---------------------------------------------------------------------------------------------------------------------------------|----------------------------|
| <b>Title and abstract</b> | 1              | (a) Indicate the study's design with a commonly used term in the title or the abstract                                          | Yes, page 1-2              |
|                           |                | (b) Provide in the abstract an informative and balanced summary of what was done and what was found                             | Yes, page 1-2              |
| <b>Introduction</b>       |                |                                                                                                                                 |                            |
| Background/rationale      | 2              | Explain the scientific background and rationale for the investigation being reported                                            | Yes, page 4-6              |
| Objectives                | 3              | State specific objectives, including any pre-specified hypotheses                                                               | Yes, page 5-6              |
| <b>Methods</b>            |                |                                                                                                                                 |                            |
| Study design              | 4              | Present key elements of study design early in the paper                                                                         | Yes, page 7                |
| Setting                   | 5              | Describe the setting, locations, and relevant dates, including periods of recruitment, exposure, follow-up, and data collection | Yes, page 7                |
| Participants              | 6              | <i>Cross-sectional study</i> —Give the eligibility criteria, and the sources and methods of selection of participants           | Yes, page 7                |

|                              |    |                                                                                                                                                                                      |               |
|------------------------------|----|--------------------------------------------------------------------------------------------------------------------------------------------------------------------------------------|---------------|
| Variables                    | 7  | Clearly define all outcomes, exposures, predictors, potential confounders, and effect modifiers. Give diagnostic criteria, if applicable                                             | Yes, page 8   |
| Data sources/<br>measurement | 8  | For each variable of interest, give sources of data and details of methods of assessment (measurement). Describe comparability of assessment methods if there is more than one group | Yes, page 9   |
| Bias                         | 9  | Describe any efforts to address potential sources of bias                                                                                                                            | NA            |
| Study size                   | 10 | Explain how the study size was arrived at                                                                                                                                            | Yes, page 9   |
| Quantitative variables       | 11 | Explain how quantitative variables were handled in the analyses. If applicable, describe which groupings were chosen and why                                                         | Yes, page 9   |
| Statistical methods          | 12 | (a) Describe all statistical methods, including those used to control for confounding                                                                                                | Yes page 9-10 |
|                              |    | (b) Describe any methods used to examine subgroups and interactions                                                                                                                  | NA            |
|                              |    | (c) Explain how missing data were addressed                                                                                                                                          | Yes page 9-10 |
|                              |    | <i>Cross-sectional study</i> —If applicable, describe analytical methods taking account of sampling strategy                                                                         | Yes page 9-10 |
|                              |    | (e) Describe any sensitivity analyses                                                                                                                                                | NA            |

| <b>Results</b>   |     |                                                                                                                                                                                                                         |                    |
|------------------|-----|-------------------------------------------------------------------------------------------------------------------------------------------------------------------------------------------------------------------------|--------------------|
| Participants     | 13* | (a) Report numbers of individuals at each stage of study—<br>e.g., numbers potentially eligible, examined for eligibility,<br>confirmed eligible, included in the study, completing<br>follow-up, and analysed          | Yes, page<br>10    |
|                  |     | (b) Give reasons for non-participation at each stage                                                                                                                                                                    | NA                 |
|                  |     | (c) Consider use of a flow diagram                                                                                                                                                                                      | NA                 |
| Descriptive data | 14* | (a) Give characteristics of study participants (e.g.,<br>demographic, clinical, social) and information on<br>exposures and potential confounders                                                                       | Yes, page<br>10    |
|                  |     | (b) Indicate number of participants with missing data for<br>each variable of interest                                                                                                                                  | NA                 |
|                  |     | (c) <i>Cohort study</i> —Summarise follow-up time (e.g.,<br>average and total amount)                                                                                                                                   | NA                 |
| Outcome data     | 15* | <i>Cross-sectional study</i> —Report numbers of outcome events<br>or summary measures                                                                                                                                   | Yes, page<br>10-11 |
| Main results     | 16  | (a) Give unadjusted estimates and, if applicable,<br>confounder-adjusted estimates and their precision (e.g.,<br>95% confidence interval). Make clear which confounders<br>were adjusted for and why they were included | Yes, page<br>10-11 |
|                  |     | (b) Report category boundaries when continuous variables<br>were categorised                                                                                                                                            | Yes, page<br>10-11 |
|                  |     | (c) If relevant, consider translating estimates of relative<br>risk into absolute risk for a meaningful time period                                                                                                     | NA                 |

|                          |    |                                                                                                                                                                            |                 |
|--------------------------|----|----------------------------------------------------------------------------------------------------------------------------------------------------------------------------|-----------------|
| Other analyses           | 17 | Report other analyses done—e.g., analyses of subgroups and interactions, and sensitivity analyses                                                                          | NA              |
| <b>Discussion</b>        |    |                                                                                                                                                                            |                 |
| Key results              | 18 | Summarise key results with reference to study objectives                                                                                                                   | Yes, page 12    |
| Limitations              | 19 | Discuss limitations of the study, taking into account sources of potential bias or imprecision. Discuss both direction and magnitude of any potential bias                 | Yes, Page 14-15 |
| Interpretation           | 20 | Give a cautious overall interpretation of results considering objectives, limitations, multiplicity of analyses, results from similar studies, and other relevant evidence | Yes, Page 13-15 |
| Generalisability         | 21 | Discuss the generalisability (external validity) of the study results                                                                                                      | Yes, 13-15      |
| <b>Other information</b> |    |                                                                                                                                                                            |                 |
| Funding                  | 22 | Give the source of funding and the role of the funders for the present study and, if applicable, for the original study on which the present article is based              | Yes, page 16    |

## Your Health

**This survey includes a wide variety of questions about your health and your life. We are interested in how you feel about each of these issues.**

- 1. In general, would you say your health is: [Mark an  in the one box that best describes your answer.]**

|                            |                            |                            |                            |                            |
|----------------------------|----------------------------|----------------------------|----------------------------|----------------------------|
| Excellent                  | Very good                  | Good                       | Fair                       | Poor                       |
| <input type="checkbox"/> 1 | <input type="checkbox"/> 2 | <input type="checkbox"/> 3 | <input type="checkbox"/> 4 | <input type="checkbox"/> 5 |

**The following items are about activities you might do during a typical day. Does your health now limit you in these activities? If so, how much? [Mark an  in a box on each line.]**

|                          |                             |                              |
|--------------------------|-----------------------------|------------------------------|
| Yes,<br>limited a<br>lot | Yes,<br>limited a<br>little | No, not<br>limited<br>at all |
|--------------------------|-----------------------------|------------------------------|

- 2. Moderate activities, such as moving a table, pushing a vacuum cleaner, bowling, or playing golf .....**  1..... 2..... 3
- 3. Climbing several flights of stairs .....**  1..... 2..... 3

**During the past 4 weeks, have you had any of the following problems with your work or other regular daily activities as a result of your physical health?**

|     |    |
|-----|----|
| Yes | No |
|-----|----|

4. Accomplished less than you would like.....  1..... 2

5. Were limited in the kind of work or other activities .....  1..... 2

**During the past 4 weeks, have you had any of the following problems with your work or other regular daily activities as a result of any emotional problems (such as feeling depressed or anxious)?**

|     |    |
|-----|----|
| Yes | No |
|-----|----|

6. Accomplished less than you would like.....  1..... 2

7. Didn't do work or other activities as carefully as usual.....  1..... 2

**8. During the past 4 weeks, how much did pain interfere with your normal work (including both work outside the home and housework)?**

|            |              |            |             |           |
|------------|--------------|------------|-------------|-----------|
| Not at all | A little bit | Moderately | Quite a bit | Extremely |
|------------|--------------|------------|-------------|-----------|

 1 2 3 4 5

**These questions are about how you feel and how things have been with you during the past 4 weeks. For each question, please give the one answer that comes closest to the way you have been feeling.**

**How much of the time during the past 4 weeks...**

|        |        |        |        |          |        |
|--------|--------|--------|--------|----------|--------|
|        |        | A good |        |          |        |
| All    | Most   | bit    | Some   | A little | None   |
| of the | of the | of the | of the | of the   | of the |
| time   | time   | time   | time   | time     | time   |

9. Have you felt calm and peaceful? .....  1.....  2.....  3.....  4.....  5.....  6
10. Did you have a lot of energy? .....  1.....  2.....  3.....  4.....  5.....  6
11. Have you felt downhearted and blue? .  1.....  2.....  3.....  4.....  5.....  6

12. **During the past 4 weeks, how much of the time has your physical health or emotional problems interfered with your social activities (like visiting with friends, relatives, etc.)?**

|             |             |             |             |             |
|-------------|-------------|-------------|-------------|-------------|
| All         | Most        | Some        | A little    | None        |
| of the time | of the time | of the time | of the time | of the time |

1                       2                       3                       4                       5

### **Additional file Item S3: Caregiver Experience Scale**

PLEASE TICK ONE BOX FOR EACH GROUP to indicate which statement best describes your current caring situation.

1. Activities outside caring (socialising, physical activity and spending time on hobbies, leisure or study)

You can do most of the other things you want to do outside caring

You can do some of the other things you want to do outside caring

You can do few of the other things you want to do outside caring

2. Support from family and friends (Personal help in caring and/or emotional support from family, friends, neighbours or work colleagues)

You get a lot of support from family and friends

You get some support from family and friends

You get little support from family and friends

3. Assistance from organisations and the Government (Help from public, private or voluntary groups in terms of benefits, respite and practical information)

You get a lot of assistance from organisations and the Government

You get some assistance from organisations and the Government

You get little assistance from organisations and the Government

4. Fulfilment from caring (Positive feeling from providing care, which may come from:

making the person you care for happy, maintaining their dignity, being appreciated, fulfilling your responsibility, gaining new skills or contributing to the care of the person you look after)

You mostly find caring fulfilling

You sometimes find caring fulfilling

You rarely find caring fulfilling

5. Control over the caring (Your ability to influence the overall care of the person you look after)

You are in control of most aspects of the caring

You are in control of some aspects of the caring

You are in control of few aspects of the caring

6. Getting on with the person you care for (Being able to talk with the person you look after, and discuss things without arguing)

You mostly get on with the person you care for

You sometimes get on with the person you care for

You rarely get on with the person you care for

©Hareth Al-Janabi, Joanna Coast & Terry Flynn



**Additional file Item S4: Background questions: (Caregivers)**

Qu 1. What is your full name? \_\_\_\_\_

Qu 2. What is your date of birth? \_\_\_\_\_ (dd/mm/yyyy)

Qu 3. Gender (please tick one)

Male  Female

Qu 4. What is your main residential postcode? \_\_\_\_\_

Qu 5. What was your country of birth? \_\_\_\_\_

Qu 6. What is the highest level of education you have completed? (please tick the box that best describes you)

Primary school

Some high school

Completed GCSEs

Completed A levels

Completed University Degree

Qu 7. Do you have private health insurance? (please tick one)

Yes

No

Don't know

Qu 8. What type of kidney treatment is your family member/friend currently having? (please tick one)

- Haemodialysis (satellite or hospital)
- Haemodialysis at home
- Peritoneal dialysis
- Non-dialysis renal supportive care

Qu 9. How long have they had kidney disease? (please tick one)

- Less than 12 months
- 1-2 years
- More than 2 years

Qu 10. How long have you been caring for this person?  
\_\_\_\_\_ (months or years)

Qu 11. What is your relationship to this person? (please tick one)

- Spouse/ partner
- Child
- Sibling
- Other

Qu 12. The next 2 questions are about the SF-12 Survey. On the scale below please rate how easy this survey was to complete  
(circle a number between 1 and 5)

|           |               |         |                    |                |
|-----------|---------------|---------|--------------------|----------------|
| Very easy | Somewhat easy | Neutral | Somewhat difficult | Very difficult |
| 1         | 2             | 3       | 4                  | 5              |

Qu 13. Did this survey measure the things that you consider important to your quality of life?  
(circle a number between 1 and 5)

|                  |                |         |                   |                     |
|------------------|----------------|---------|-------------------|---------------------|
| Completely agree | Somewhat agree | Neutral | Somewhat disagree | Completely disagree |
| 1                | 2              | 3       | 4                 | 5                   |

Qu 14. If you responded with 'somewhat disagree' or 'completely disagree,' would you like to tell us what you think the SF-12 Survey was missing?

---



---



---



---



---

Qu 15. The next 2 questions are about the Carer Experience Scale. On the scale below please rate how easy this survey was to complete (circle a number between 1 and 5)

|           |               |         |                    |                |
|-----------|---------------|---------|--------------------|----------------|
| Very easy | Somewhat easy | Neutral | Somewhat difficult | Very difficult |
| 1         | 2             | 3       | 4                  | 5              |

Qu 16. Did this survey measure the things that you consider important to your quality of life? (circle a number between 1 and 5)

|                  |                |         |                   |                     |
|------------------|----------------|---------|-------------------|---------------------|
| Completely agree | Somewhat agree | Neutral | Somewhat disagree | Completely disagree |
| 1                | 2              | 3       | 4                 | 5                   |

Qu 17. If you responded with 'somewhat disagree' or 'completely disagree,' would you like to tell us what you think the Carer Experience Scale was missing?

---



---



---

Qu 18. Are there any other comments you would like to make about the surveys?

---



---



---

Thank you very much for taking the time to participate in this study. Please place your completed survey in the stamped envelope provided and hand back to the renal unit or post it to the university as soon as possible.

We greatly appreciate your assistance.
